# Supplementary material
Source: publisher figshare collection journal article supplement (https://plos.figshare.com/articles/dataset/_/796278)
Supplement: Supplementary file [file Table_S1.pdf › Table_S1.pdf]

# Are hotspots always hotspots? The relationship between diversity, resource and ecosystem functions in the Arctic

Heike Link, Dieter Piepenburg, Philippe Archambault

**Table S1. Taxa list.** The table presents all taxa identified during this study and the accorded functional traits. For details on functional trait categories and levels, see Table 2.

| Class       | Species/taxon                          | Feeding | Size | Motility | Bioturbation |
|-------------|----------------------------------------|---------|------|----------|--------------|
| Oligochaeta | <i>Oligochaeta sp.</i>                 | S       | L    | M        | T            |
| Polychaeta  | <i>Ophryotrocha sp.</i>                | O       | S    | M        | S            |
| Polychaeta  | <i>Schistomeringos caeca</i>           | C       | S    | M        | B            |
| Polychaeta  | <i>Schistomeringos rudolphii</i>       | C       | M    | M        | B            |
| Polychaeta  | <i>Lumbrineris scopa</i>               | OC      | L    | M        | G            |
| Polychaeta  | <i>Lumbrineris sp.</i>                 | OC      | M    | M        | G            |
| Polychaeta  | <i>Lumbrineris sp. 1</i>               | OC      | M    | M        | G            |
| Polychaeta  | <i>Lumbrineris sp. 2</i>               | OC      | M    | M        | G            |
| Polychaeta  | <i>Lumbrineris sp. 3 cf. fauchaldi</i> | OC      | L    | M        | G            |
| Polychaeta  | <i>Lumbrineris sp. 4 cf. fragilis</i>  | OC      | L    | M        | G            |
| Polychaeta  | <i>Lumbrineris tetraura/impatiens</i>  | C       | L    | M        | G            |
| Polychaeta  | <i>Nothria conchylega</i>              | O       | L    | H        | S            |
| Polychaeta  | <i>Paradiopatra quadricuspis</i>       | OC      | L    | H        | S            |
| Polychaeta  | <i>Chrysopetalidae sp.</i>             | C       | M    | M        | S            |
| Polychaeta  | <i>Hesionidae sp.</i>                  | O       | M    | M        | B            |
| Polychaeta  | <i>Nereimyra sp.</i>                   | C       | M    | M        | B            |
| Polychaeta  | <i>Aglaophamus malmgreni</i>           | C       | M    | M        | G            |
| Polychaeta  | <i>Bipalponephtys neotena</i>          | C       | M    | M        | G            |
| Polychaeta  | <i>Micronephtys minuta</i>             | C       | S    | M        | G            |
| Polychaeta  | <i>Nephtyidae sp. 2</i>                | C       | M    | M        | G            |
| Polychaeta  | <i>Nephtyidae sp. 1 cf. Nephtys</i>    | C       | M    | M        | G            |
| Polychaeta  | <i>Nephtys ciliata</i>                 | C       | L    | M        | G            |
| Polychaeta  | <i>Pholoe longa</i>                    | C       | M    | M        | B            |
| Polychaeta  | <i>Pholoe sp.</i>                      | C       | S    | M        | B            |
| Polychaeta  | <i>Eteone flava/longa</i>              | CO      | L    | M        | B            |
| Polychaeta  | <i>Eteone sp.</i>                      | CO      | L    | M        | B            |
| Polychaeta  | <i>Phyllodoce sp.</i>                  | CO      | L    | M        | B            |
| Polychaeta  | <i>Bylgides sarsi</i>                  | C       | L    | M        | S            |
| Polychaeta  | <i>Eucranta sp.</i>                    | C       | L    | M        | S            |
| Polychaeta  | <i>Eucranta villosa</i>                | C       | L    | M        | S            |
| Polychaeta  | <i>Gattyana cirrosa</i>                | C       | L    | M        | S            |
| Polychaeta  | <i>Polynoidae</i>                      | C       | L    | M        | B            |
| Polychaeta  | <i>Polynoidae sp. 1</i>                | C       | L    | M        | B            |
| Polychaeta  | <i>Clavodorum sp.</i>                  | D       | S    | M        | S            |
| Polychaeta  | <i>Sphaerodoropsis sp. 2</i>           | D       | S    | M        | S            |
| Polychaeta  | <i>Sphaerodoropsis sp. 1 cf. furca</i> | D       | S    | M        | S            |
| Polychaeta  | <i>Sphaerodorum gracilis</i>           | D       | S    | M        | S            |
| Polychaeta  | <i>Anguillosyllis pupa</i>             | D       | S    | M        | S            |
| Polychaeta  | <i>Anguillosyllis sp.</i>              | D       | M    | M        | S            |
| Polychaeta  | <i>Erinaceusyllis sp.</i>              | D       | S    | M        | S            |
| Polychaeta  | <i>Exogone naidina</i>                 | D       | S    | M        | S            |
| Polychaeta  | <i>Exogoninae sp.</i>                  | D       | S    | M        | S            |
| Polychaeta  | <i>Prosphaerosyllis sp. nov.</i>       | D       | S    | M        | S            |
| Polychaeta  | <i>Streptosyllis sp. nov. 1</i>        | CO      | S    | M        | S            |
| Polychaeta  | <i>Streptosyllis sp. nov. 2</i>        | CO      | S    | M        | S            |
| Polychaeta  | <i>Syllis sp.</i>                      | C       | M    | M        | S            |
| Polychaeta  | <i>Galathowenia</i>                    | D       | M    | H        | T            |
| Polychaeta  | <i>Galathowenia oculata</i>            | D       | M    | H        | T            |
| Polychaeta  | <i>Myriochele heeri</i>                | D       | M    | H        | T            |

Table S1 continued

| Class      | Species/taxon                                | Feeding | Size | Motility | Bioturbation |
|------------|----------------------------------------------|---------|------|----------|--------------|
| Polychaeta | <i>Myriochele olgae</i>                      | D       | M    | H        | T            |
| Polychaeta | <i>Myrioglobula malmgreni</i>                | DF      | L    | H        | T            |
| Polychaeta | <i>Owenia borealis</i>                       | DF      | L    | H        | T            |
| Polychaeta | <i>Owenia polaris</i>                        | DF      | L    | H        | T            |
| Polychaeta | <i>Owenia sp.</i>                            | DF      | L    | H        | T            |
| Polychaeta | <i>Chone sp.</i>                             | F       | L    | S        | T            |
| Polychaeta | <i>Euchone analis</i>                        | F       | L    | S        | T            |
| Polychaeta | <i>Euchone incolor</i>                       | F       | L    | S        | T            |
| Polychaeta | <i>Jasmineira schaudinni</i>                 | F       | L    | S        | T            |
| Polychaeta | <i>Jasmineira sp.</i>                        | F       | L    | S        | T            |
| Polychaeta | <i>Oriopsis sp.</i>                          | F       | L    | S        | T            |
| Polychaeta | <i>Sabellidae sp.</i>                        | F       | L    | S        | T            |
| Polychaeta | <i>Spirorbis sp.</i>                         | F       | M    | S        | S            |
| Polychaeta | <i>Capitella capitata</i>                    | S       | L    | H        | G            |
| Polychaeta | <i>Capitellidae sp.</i>                      | S       | L    | H        | G            |
| Polychaeta | <i>Hetero- or Mediomastus</i>                | S       | L    | H        | G            |
| Polychaeta | <i>Heteromastus filiformis</i>               | S       | L    | H        | G            |
| Polychaeta | <i>Heteromastus sp.</i>                      | S       | L    | H        | G            |
| Polychaeta | <i>Notomastus sp.</i>                        | S       | L    | M        | B            |
| Polychaeta | <i>Cossura pygodactyla</i>                   | S       | M    | H        | T            |
| Polychaeta | <i>Cossura sp.</i>                           | S       | M    | M        | B            |
| Polychaeta | <i>Asychis biceps</i>                        | S       | L    | S        | T            |
| Polychaeta | <i>Asychis sp. 1</i>                         | S       | L    | S        | T            |
| Polychaeta | <i>Clymenura polaris</i>                     | S       | L    | S        | T            |
| Polychaeta | <i>Clymenura sp. 1</i>                       | S       | L    | S        | T            |
| Polychaeta | <i>Lumbriclymeninae sp.</i>                  | S       | L    | S        | T            |
| Polychaeta | <i>Maldane arctica</i>                       | S       | L    | S        | T            |
| Polychaeta | <i>Maldane glebifex</i>                      | S       | L    | S        | T            |
| Polychaeta | <i>Maldane sarsi</i>                         | S       | L    | S        | T            |
| Polychaeta | <i>Maldane sp. (arctica + sarsi)</i>         | S       | L    | S        | T            |
| Polychaeta | <i>Maldanidae sp. 1</i>                      | S       | L    | S        | T            |
| Polychaeta | <i>Maldanidae sp. 2</i>                      | S       | L    | S        | T            |
| Polychaeta | <i>Maldanidae sp. 3</i>                      | S       | L    | S        | T            |
| Polychaeta | <i>Maldanidae sp. 4</i>                      | S       | L    | S        | T            |
| Polychaeta | <i>Maldanidae sp. 5</i>                      | S       | L    | S        | T            |
| Polychaeta | <i>Maldanidae sp. 6</i>                      | S       | L    | S        | T            |
| Polychaeta | <i>Maldanidae spp.</i>                       | S       | L    | S        | T            |
| Polychaeta | <i>Nicomache cf. lumbricalis</i>             | S       | L    | S        | T            |
| Polychaeta | <i>Nicomache quadrispinata</i>               | S       | L    | S        | T            |
| Polychaeta | <i>Nicomachenae/Petaloproctus</i>            | S       | L    | S        | T            |
| Polychaeta | <i>Petaloproctus tenuis</i>                  | S       | L    | S        | T            |
| Polychaeta | <i>Praxillela affinis</i>                    | S       | L    | S        | T            |
| Polychaeta | <i>Praxillela gracilis</i>                   | S       | L    | S        | T            |
| Polychaeta | <i>Praxillela/axiothella</i>                 | S       | L    | S        | T            |
| Polychaeta | <i>Ophelina cylindrica</i>                   | S       | M    | M        | G            |
| Polychaeta | <i>Ophelina sp. 2</i>                        | S       | M    | M        | G            |
| Polychaeta | <i>Ophelina sp. 1 cf. breviata</i>           | S       | M    | M        | G            |
| Polychaeta | <i>Scoloplos sp. 2</i>                       | S       | L    | M        | B            |
| Polychaeta | <i>Scoloplos sp. 1 cf. acutus ou armiger</i> | S       | L    | M        | B            |
| Polychaeta | <i>Aricidea fragilis</i>                     | D       | M    | H        | B            |
| Polychaeta | <i>Aricidea nolani</i>                       | D       | M    | H        | G            |
| Polychaeta | <i>Aricidea quadrilobata</i>                 | D       | M    | H        | G            |
| Polychaeta | <i>Aricidea sp. 1</i>                        | D       | M    | H        | G            |
| Polychaeta | <i>Aricidea sp. 2</i>                        | D       | M    | H        | G            |
| Polychaeta | <i>Aricidea sp. 3 cf. hartmani</i>           | D       | M    | H        | G            |
| Polychaeta | <i>Aricidea sp. 4</i>                        | D       | M    | H        | G            |
| Polychaeta | <i>Aricidea suecica</i>                      | DF      | M    | H        | G            |
| Polychaeta | <i>Levinsenia (Paraonis) gracilis</i>        | D       | M    | H        | G            |

Table S1 continued

| Class      | Species/taxon                                    | Feeding | Size | Motility | Bioturbation |
|------------|--------------------------------------------------|---------|------|----------|--------------|
| Polychaeta | <i>Paraonidae</i>                                | D       | M    | H        | G            |
| Polychaeta | <i>Scalibregma inflatum</i>                      | S       | S    | M        | B            |
| Polychaeta | <i>Scalibregmatidae</i> sp.                      | S       | S    | M        | B            |
| Polychaeta | <i>Apistobranchus</i> sp. cf. <i>tullbergi</i>   | D       | M    | H        | T            |
| Polychaeta | <i>Spiochaetopterus</i> sp. cf. <i>typicus</i>   | DF      | L    | S        | T            |
| Polychaeta | <i>Dipolydora caulleryi</i>                      | DF      | M    | H        | T            |
| Polychaeta | <i>Dipolydora</i> sp.                            | DF      | M    | H        | T            |
| Polychaeta | <i>Laonice</i> sp. cf. <i>cirrata</i>            | DF      | M    | H        | T            |
| Polychaeta | <i>Polydora</i> / <i>Dipolydora</i>              | DF      | M    | H        | T            |
| Polychaeta | <i>Prionospio cirrifera</i>                      | DF      | M    | H        | T            |
| Polychaeta | <i>Prionospio</i> sp.                            | DF      | M    | H        | T            |
| Polychaeta | <i>Prionospio steenstrupi</i>                    | DF      | M    | H        | T            |
| Polychaeta | <i>Spio</i> sp.                                  | DF      | M    | H        | T            |
| Polychaeta | <i>Spionidae</i> w/o <i>branchia</i>             | D       | M    | H        | T            |
| Polychaeta | <i>Trochochaeta multisetosa</i>                  | D       | L    | S        | T            |
| Polychaeta | <i>Trochochaeta watsoni</i>                      | D       | L    | S        | T            |
| Polychaeta | <i>Amage gallasii</i>                            | DF      | M    | M        | B            |
| Polychaeta | <i>Amage</i> sp. cf. <i>auricula</i>             | DF      | M    | H        | B            |
| Polychaeta | <i>Ampharete finmarchica</i>                     | D       | L    | S        | T            |
| Polychaeta | <i>Ampharete</i> sp.                             | D       | L    | S        | T            |
| Polychaeta | <i>Ampharetidae</i> sp. 1                        | D       | L    | S        | T            |
| Polychaeta | <i>Ampharetidae</i> sp. 2 = <i>Amythasides</i>   | D       | L    | S        | T            |
| Polychaeta | <i>Ampharetidae</i> sp. 3                        | D       | L    | S        | T            |
| Polychaeta | <i>Ampharetidae</i> juv                          | D       | M    | S        | T            |
| Polychaeta | <i>Ampharetinae</i> sp.                          | D       | L    | S        | T            |
| Polychaeta | <i>Ampharetinae</i> sp. 1                        | D       | L    | S        | T            |
| Polychaeta | <i>Ampharetinae</i> sp. 2                        | D       | L    | S        | T            |
| Polychaeta | <i>Ampharetinae</i> sp. 3                        | D       | L    | S        | T            |
| Polychaeta | <i>Ampharetinae</i> sp. 4                        | D       | L    | S        | T            |
| Polychaeta | <i>Amphicteis gunneri</i>                        | D       | L    | S        | T            |
| Polychaeta | <i>Auchenoplax</i> sp.                           | D       | L    | S        | T            |
| Polychaeta | <i>Glyphanostomum pallescens</i>                 | D       | L    | S        | T            |
| Polychaeta | <i>Pterolysippe vanelli</i>                      | D       | M    | H        | B            |
| Polychaeta | <i>Sabellides borealis</i>                       | DF      | L    | S        | T            |
| Polychaeta | <i>Aphelochaeta</i> sp.                          | D       | L    | H        | B            |
| Polychaeta | <i>Chaetozone</i> sp. 1 cf. <i>setosa</i>        | D       | M    | M        | B            |
| Polychaeta | <i>Chaetozone</i> sp. 2                          | D       | M    | M        | B            |
| Polychaeta | <i>Chaetozone</i> / <i>Tharyx</i>                | D       | M    | M        | B            |
| Polychaeta | <i>Cirratulidae</i>                              | D       | L    | H        | B            |
| Polychaeta | <i>Monticellina</i> sp.                          | D       | M    | H        | B            |
| Polychaeta | <i>Tharyx</i> sp.                                | D       | M    | H        | B            |
| Polychaeta | <i>Brada villosa</i>                             | D       | L    | H        | S            |
| Polychaeta | <i>Diplocirrus hirsutus</i>                      | D       | M    | H        | S            |
| Polychaeta | <i>Diplocirrus</i> sp. 1 cf. <i>longisetosus</i> | D       | M    | H        | S            |
| Polychaeta | <i>Flabelligeridae</i>                           | D       | M    | H        | S            |
| Polychaeta | <i>Cistenides hyperborea</i>                     | S       | L    | M        | B            |
| Polychaeta | <i>Paramphitrite</i> sp.                         | D       | L    | S        | T            |
| Polychaeta | <i>Pista</i> sp.                                 | D       | L    | S        | T            |
| Polychaeta | <i>Polycirrus arcticus</i>                       | D       | L    | H        | T            |
| Polychaeta | <i>Polycirrus</i> sp.                            | D       | L    | H        | T            |
| Polychaeta | <i>Proclea graffi</i>                            | D       | L    | S        | T            |
| Polychaeta | <i>Proclea malmgreni</i>                         | D       | L    | S        | T            |
| Polychaeta | <i>Terebellidae</i> sp. 1                        | D       | L    | S        | T            |
| Polychaeta | <i>Terebellidae</i> sp. 2                        | D       | L    | S        | T            |
| Polychaeta | <i>Terebellinae</i> ( <i>Amphitritinae</i> ) sp. | D       | L    | S        | T            |
| Polychaeta | <i>Thelepodinae</i>                              | D       | L    | S        | T            |
| Polychaeta | <i>Terebellides bigeniculatus</i>                | D       | L    | S        | T            |
| Polychaeta | <i>Terebellides</i> cf. <i>williamsae</i>        | D       | L    | S        | T            |

Table S1 continued

| Class        | Species/taxon                                | Feeding | Size | Motility | Bioturbation |
|--------------|----------------------------------------------|---------|------|----------|--------------|
| Polychaeta   | <i>Terebellides sp.</i>                      | D       | L    | S        | T            |
| Polychaeta   | <i>Terebellides stroemi</i>                  | D       | L    | S        | T            |
| Polychaeta   | <i>Terebellomorpha sp. 1</i>                 |         |      |          |              |
| Polychaeta   | <i>Terebellomorpha sp. 2</i>                 |         |      |          |              |
| Malacostraca | <i>Byblis gaimardii</i>                      | F       | L    | H        | S            |
| Malacostraca | <i>Haploops oonah</i>                        | F       | L    | H        | S            |
| Malacostraca | <i>Haploops sp.</i>                          | F       | L    | H        | S            |
| Malacostraca | <i>Haploops tubicola</i>                     | F       | L    | H        | S            |
| Malacostraca | <i>Argissa hamatipes</i>                     | S       | L    | M        | B            |
| Malacostraca | <i>Caprella septentrionalis</i>              | D       | L    | M        | S            |
| Malacostraca | <i>Gammaridae</i>                            | D       | M    | M        | B            |
| Malacostraca | <i>Paraphoxus oculatus</i>                   | D       | M    | M        | B            |
| Malacostraca | <i>Isaiedae sp.</i>                          | F       | L    | H        | B            |
| Malacostraca | <i>Ischyrocerus megacheir</i>                | F       | M    | M        | B            |
| Malacostraca | <i>Ischyrocerus sp.</i>                      | F       | M    | M        | B            |
| Malacostraca | <i>Lysianassidae sp.</i>                     | O       | L    | M        | S            |
| Malacostraca | <i>Paracentromedon sp.</i>                   | O       | L    | M        | S            |
| Malacostraca | <i>Paronesimus sp.</i>                       | O       | L    | M        | S            |
| Malacostraca | <i>Aceroides latipes</i>                     | C       | M    | M        | B            |
| Malacostraca | <i>Bathymedon sp. cf. Obtusifrons</i>        | C       | M    | M        | B            |
| Malacostraca | <i>Oediceropsis brevicornis</i>              | C       | M    | M        | B            |
| Malacostraca | <i>Oedicerotidae</i>                         | C       | M    | M        | B            |
| Malacostraca | <i>Paroedicerus sp.</i>                      | C       | M    | M        | B            |
| Malacostraca | <i>Halice sp.</i>                            | S       | M    | H        | B            |
| Malacostraca | <i>Pardaliscidae sp.</i>                     | S       | M    | H        | B            |
| Malacostraca | <i>Pontoporeia femorata</i>                  | D       | M    | M        | B            |
| Malacostraca | <i>Diastylidae sp. 1</i>                     | DF      | M    | M        | S            |
| Malacostraca | <i>Diastylidae sp. 2</i>                     | DF      | M    | M        | S            |
| Malacostraca | <i>Diastylis lucifera</i>                    | DF      | M    | M        | S            |
| Malacostraca | <i>Diastylis rathkei</i>                     | DF      | M    | M        | S            |
| Malacostraca | <i>Diastylis sp.</i>                         | DF      | M    | M        | S            |
| Malacostraca | <i>Ektonodiastylis nimia/Brachydiastylis</i> | DF      | M    | M        | S            |
| Malacostraca | <i>Eudorella emarginata</i>                  | DF      | M    | M        | S            |
| Malacostraca | <i>Eudorella sp.</i>                         | DF      | M    | M        | S            |
| Malacostraca | <i>Eudorellopsis integra</i>                 | DF      | M    | M        | S            |
| Malacostraca | <i>Leucon acutirostris</i>                   | DF      | M    | M        | S            |
| Malacostraca | <i>Leucon fulvus</i>                         | DF      | M    | M        | S            |
| Malacostraca | <i>Leucon nasicus</i>                        | DF      | M    | M        | S            |
| Malacostraca | <i>Leucon sp.</i>                            | DF      | M    | M        | S            |
| Malacostraca | <i>Leuconidae sp. 1</i>                      | DF      | M    | M        | S            |
| Malacostraca | <i>other 1</i>                               | DF      | M    | M        | S            |
| Malacostraca | <i>other 2</i>                               | DF      | M    | M        | S            |
| Malacostraca | <i>Saduria sabini</i>                        | C       | L    | M        | S            |
| Malacostraca | <i>Desmosoma lineare</i>                     | S       | S    | M        | B            |
| Malacostraca | <i>Eugerdia tenuimana</i>                    | S       | S    | M        | B            |
| Malacostraca | <i>Caecognathia stygia</i>                   | P       | M    | H        | S            |
| Malacostraca | <i>Gnathia sp.</i>                           | P       | M    | H        | S            |
| Malacostraca | <i>Synidotea bicuspidata</i>                 | D       | L    | M        | S            |
| Malacostraca | <i>Ilyarachna hirticeps</i>                  | C       | M    | M        | S            |
| Malacostraca | <i>Pleurogonium spinosissimum</i>            | S       | M    | M        | B            |
| Malacostraca | <i>Leptognathia sp.</i>                      | D       | M    | H        | S            |
| Malacostraca | <i>Akanthophoreus gracilis</i>               | D       | S    | H        | S            |
| Malacostraca | <i>Akanthophoreus sp. cf. disa</i>           | D       | S    | H        | S            |
| Malacostraca | <i>Pseudotanaïs affinis</i>                  | D       | M    | H        | S            |
| Malacostraca | <i>Pseudotanaïs forcipatus</i>               | D       | M    | H        | S            |
| Malacostraca | <i>Pseudotanaïs sp.</i>                      | D       | M    | H        | S            |
| Malacostraca | <i>Pseudosphyrapus serratus</i>              | C       | M    | M        | B            |

Table S1 continued

| Class         | Species/taxon                                   | Feeding | Size | Motility | Bioturbation |
|---------------|-------------------------------------------------|---------|------|----------|--------------|
| Malacostraca  | <i>Typhlotanais sp.</i>                         | D       | S    | H        | S            |
| Malacostraca  | <i>Tanaidae</i>                                 | D       | S    | H        | S            |
| Ostracoda     | <i>Cypridininae</i>                             | CO      | S    | M        | S            |
| Ostracoda     | <i>Philomedes sp. 1</i>                         | D       | S    | M        | S            |
| Ostracoda     | <i>Philomedes sp. 2 cf. brenda</i>              | D       | S    | M        | S            |
| Ostracoda     | <i>Scleroconcha sp.</i>                         | D       | S    | M        | S            |
| Ostracoda     | <i>Myodocopida</i>                              | D       | S    | M        | S            |
| Ostracoda     | <i>Hemicytheridea sp.</i>                       | CO      | S    | M        | S            |
| Ostracoda     | <i>Sarsicytheridea sp.</i>                      | CO      | S    | M        | S            |
| Ostracoda     | <i>Trachyleberididea sp.</i>                    | CO      | S    | M        | S            |
| Ostracoda     | <i>Acanthocythereis sp. cf. dunelmensis</i>     | CO      | S    | M        | S            |
| Ostracoda     | <i>Podocopida (Ostracoda B)</i>                 | CO      | S    | M        | S            |
| Pycnogonida   | <i>Nymphon sp. 1 cf. hirtum</i>                 | C       | L    | M        | S            |
| Pycnogonida   | <i>Nymphon sp. 2 cf. hirtipes</i>               | C       | L    | M        | S            |
| Pycnogonida   | <i>Nymphon sp. 3</i>                            | C       | L    | M        | S            |
| Bryozoa       | <i>Bryozoa</i>                                  | F       | L    | S        | S            |
| Gymnolemata   | <i>Notoplites sp.</i>                           | F       | M    | S        | S            |
| Gymnolemata   | <i>Eucratea loricata</i>                        | F       | L    | S        | S            |
| Gymnolemata   | <i>Romancheinidae sp.</i>                       | F       | L    | S        | S            |
| Gymnolemata   | <i>Alcyonidium sp.</i>                          | F       | M    | S        | S            |
| Gymnolemata   | <i>Alcyonidium sp. 2</i>                        | F       | M    | S        | S            |
| Priapulida    | <i>Priapulida</i>                               | S       | L    | H        | B            |
| Priapulida    | <i>Priapulopsis bicaudatus</i>                  | S       | L    | H        | B            |
| Ascidacea     | <i>Phlebobranchia sp.</i>                       | F       | L    | S        | S            |
| Ascidacea     | <i>Polycarpa</i>                                | F       | M    | S        | S            |
| Ascidacea     | <i>Ascideacea sp. 1</i>                         | F       | M    | S        | S            |
| Ascidacea     | <i>Ascideacea sp. 2</i>                         | F       | M    | S        | S            |
| Anthozoa      | <i>Actinostolidae sp.</i>                       | FCO     | L    | S        | S            |
| Anthozoa      | <i>Edwardsidae</i>                              | C       | M    | H        | B            |
| Anthozoa      | <i>Athenaria sp. cf. halcampa</i>               | C       | M    | H        | B            |
| Anthozoa      | <i>Actinaria sp.</i>                            | C       | M    | H        | S            |
| Anthozoa      | <i>Cerianthidae sp.</i>                         | C       | L    | H        | B            |
| Anthozoa      | <i>Anthozoa sp. 1</i>                           | C       | M    | H        | S            |
| Anthozoa      | <i>Anthozoa sp. 2</i>                           | C       | M    | H        | S            |
| Hydrozoa      | <i>Anthoathecata</i>                            | FCO     | L    | S        | S            |
| Hydrozoa      | <i>Obelia sp.</i>                               | FCO     | L    | S        | S            |
| Hydrozoa      | <i>Sertularia sp.</i>                           | FCO     | L    | S        | S            |
| Hydrozoa      | <i>Sertulariidae spp.</i>                       | FCO     | L    | S        | S            |
| Hydrozoa      | <i>Thuiaria sp.</i>                             | FCO     | L    | S        | S            |
| Hydrozoa      | <i>Tiaropsis multicirrata</i>                   | FCO     | M    | M        | S            |
| Hydrozoa      | <i>rhizome</i>                                  | FCO     | L    | S        | S            |
| Asteroidea    | <i>Asteroidea</i>                               | C       | L    | M        | S            |
| Asteroidea    | <i>Ctenodiscus crispatus</i>                    | DO      | L    | M        | B            |
| Echinodermata | <i>Echinoderm larvae</i>                        | D       | L    | M        | S            |
| Holothuroidea | <i>Holothuridae sp. 1</i>                       | D       | M    | M        | B            |
| Holothuroidea | <i>Holothuridaesp. 2</i>                        | D       | M    | M        | B            |
| Holothuroidea | <i>Holothuridae sp. 3</i>                       | D       | M    | M        | B            |
| Ophiuroidea   | <i>Ophiocten sericeum</i>                       | DO      | L    | M        | S            |
| Ophiuroidea   | <i>Ophiuroidea</i>                              | DO      | L    | M        | S            |
| Enteropneusta | <i>Enteropneusta</i>                            | D       | L    | M        | B            |
| Bivalvia      | <i>Cuspidaria sp. cf. glacialis</i>             | C       | L    | H        | B            |
| Bivalvia      | <i>Cuspidariidae</i>                            | C       | M    | H        | B            |
| Bivalvia      | <i>Bathyarca sp.</i>                            | F       | M    | S        | S            |
| Bivalvia      | <i>Astarte sp. 1 cf. elliptica ou esquimati</i> | F       | L    | H        | B            |
| Bivalvia      | <i>Astarte sp. 2 cf. montagui</i>               | F       | L    | H        | B            |
| Bivalvia      | <i>Limidae</i>                                  | F       | M    | S        | S            |
| Bivalvia      | <i>Bivalvia sp. 2 (Thyasiridae)</i>             | F       | M    | H        | B            |

Table S1 continued

| Class        | Species/taxon                     | Feeding | Size | Motility | Bioturbation |
|--------------|-----------------------------------|---------|------|----------|--------------|
| Bivalvia     | <i>Thyasira sp. (east)</i>        | F       | M    | H        | B            |
| Bivalvia     | <i>Thyasira sp. (west)</i>        | F       | M    | H        | B            |
| Bivalvia     | <i>Crenella faba</i>              | F       | L    | S        | S            |
| Bivalvia     | <i>Dacrydium</i>                  | F       | M    | S        | S            |
| Bivalvia     | <i>Dacrydium viviparum</i>        | F       | M    | S        | S            |
| Bivalvia     | <i>Musculus glacialis</i>         | F       | L    | S        | S            |
| Bivalvia     | <i>Musculus niger</i>             | F       | L    | S        | S            |
| Bivalvia     | <i>Mytilidae</i>                  | F       | M    | S        | S            |
| Bivalvia     | <i>Portlandia sp. cf. frigida</i> | S       | M    | H        | B            |
| Bivalvia     | <i>Ennucula tenuis</i>            | S       | M    | M        | B            |
| Bivalvia     | <i>Nucula sp.</i>                 | S       | M    | M        | B            |
| Bivalvia     | <i>Montacuta sp.</i>              | F       | M    | S        | B            |
| Bivalvia     | <i>Montacutidae sp.</i>           | F       | M    | S        | B            |
| Bivalvia     | <i>Macoma calcarea</i>            | DF      | L    | H        | B            |
| Bivalvia     | <i>Bivalvia decalcifié</i>        | DF      | M    | H        | B            |
| Bivalvia     | <i>Bivalvia sp. 1</i>             | DF      | M    | H        | B            |
| Bivalvia     | <i>Bivalvia sp. 3</i>             | DF      | M    | H        | B            |
| Caudofoveata | <i>Chaetoderma</i>                | CO      | L    | M        | B            |
| Gastropoda   | <i>Tachyrhynchus erosus</i>       | F       | L    | M        | S            |
| Gastropoda   | <i>Cylichna sp. cf. alba</i>      | C       | M    | M        | S            |
| Gastropoda   | <i>Philinoidea</i>                | C       | M    | M        | S            |
| Gastropoda   | <i>Retusa obtusa</i>              | C       | M    | M        | S            |
| Gastropoda   | <i>Heterobranchia</i>             | C       | M    | M        | S            |
| Gastropoda   | <i>Pyramidelloidea</i>            | O       | M    | M        | S            |
| Gastropoda   | <i>Buccinidae</i>                 | C       | L    | M        | S            |
| Gastropoda   | <i>Gastropoda</i>                 | D       | M    | M        | S            |
| Scaphopoda   | <i>Scaphopoda</i>                 | C       | M    | H        | B            |
| Nematoda     | <i>Nematodes</i>                  | S       | S    | M        | G            |
| Nemertea     | <i>Nemerti</i>                    | C       | L    | M        | S            |
| Demospongiae | <i>Demospongiae</i>               | F       | M    | S        | S            |
| Sipuncula    | <i>Sipunculida</i>                | D       | M    | M        | T            |
|              | <i>Foraminifera</i>               | D       | S    | S        | S            |
