# Supplementary material
Source: publisher figshare collection journal article supplement (https://plos.figshare.com/articles/dataset/_/796278)
Supplement: Supplementary file [file Table_S2.pdf › Table_S2.pdf]

# Are hotspots always hotspots? The relationship between diversity, resource and ecosystem functions in the Arctic

Heike Link, Dieter Piepenburg, Philippe Archambault

**Table S2.** Sediment pigment concentrations (Chl *a* and phaeopigments ‘Phaeo’), community descriptors (taxonomic richness  $S_{\text{Tax}}$ , total abundance  $N$ , functional group richness  $S_{\text{Func}}$  and Shannon-Wiener Index  $H'_{\text{Func}}$ ) and abiotic variables used in the study.

| Regime    | Site  | Year | Chl <i>a</i><br>[ $\mu\text{g g}^{-1}$ ] | Phaeo<br>[ $\mu\text{g g}^{-1}$ ] | $S_{\text{Tax}}$ | $N$<br>[ind.] | $S_{\text{Func}}$<br>c | $H'_{\text{Func}}$ | Depth<br>[m] | Ice-melt<br>[d <sub>Julian</sub> ] |
|-----------|-------|------|------------------------------------------|-----------------------------------|------------------|---------------|------------------------|--------------------|--------------|------------------------------------|
| Hotspots  | MD-C  | 2008 | 23.33                                    | 36.44                             | 31               | 129           | 23                     | 2.67               | 45           | 161                                |
|           |       |      | 14.25                                    | 31.96                             | 20               | 172           | 16                     | 2.25               | 45           | 161                                |
|           |       |      | 32.44                                    | 43.58                             | 32               | 142           | 24                     | 2.57               | 45           | 161                                |
|           |       | 2009 | 3.55                                     | 16.93                             | 25               | 89            | 19                     | 1.82               | 47           | 160                                |
|           |       |      | 3.82                                     | 9.15                              | 15               | 75            | 14                     | 1.84               | 47           | 160                                |
|           |       |      | 3.89                                     | 10.92                             | 19               | 96            | 16                     | 2.09               | 47           | 160                                |
|           | AG-CW | 2008 | 0.53                                     | 14.66                             | 22               | 53            | 16                     | 2.38               | 206          | 182                                |
|           |       |      | 1.11                                     | 15.43                             | 28               | 98            | 21                     | 2.11               | 206          | 182                                |
|           |       |      | 0.87                                     | 15.30                             | 24               | 89            | 18                     | 1.74               | 206          | 182                                |
|           |       | 2009 | 1.37                                     | 10.81                             | 30               | 55            | 19                     | 2.63               | 154          | 202                                |
|           |       |      | 0.90                                     | 10.71                             | 28               | 87            | 23                     | 2.67               | 154          | 202                                |
|           |       |      | 0.79                                     | 12.06                             | 23               | 60            | 18                     | 2.60               | 154          | 202                                |
|           | LS-W  | 2008 | 18.29                                    | 37.72                             | 41               | 186           | 32                     | 2.59               | 353          | 217                                |
|           |       |      | 14.02                                    | 43.00                             | 34               | 155           | 24                     | 2.50               | 353          | 217                                |
|           |       |      | 10.11                                    | 40.82                             | 45               | 197           | 31                     | 2.62               | 353          | 217                                |
|           |       | 2009 | 6.92                                     | 33.98                             | 42               | 253           | 29                     | 1.95               | 331          | 146                                |
|           |       |      | 3.57                                     | 18.04                             | 36               | 262           | 25                     | 1.93               | 331          | 146                                |
|           |       |      | 4.55                                     | 23.68                             | 33               | 274           | 23                     | 1.78               | 331          | 146                                |
|           | LS-E  | 2008 | 3.21                                     | 26.74                             | 36               | 253           | 25                     | 1.90               | 707          | 182                                |
|           |       |      | 4.19                                     | 33.80                             | 41               | 361           | 25                     | 1.77               | 707          | 182                                |
|           |       |      | 3.33                                     | 31.34                             | 29               | 238           | 21                     | 1.50               | 707          | 182                                |
|           |       | 2009 | 2.73                                     | 32.27                             | 31               | 308           | 20                     | 1.51               | 786          | 167                                |
|           |       |      | 1.50                                     | 21.65                             | 26               | 485           | 18                     | 0.85               | 786          | 167                                |
|           |       |      | 1.40                                     | 19.26                             | 28               | 457           | 20                     | 0.95               | 786          | 167                                |
|           | NW-C  | 2008 | 3.53                                     | 35.34                             | 27               | 978           | 19                     | 0.65               | 444          | 147                                |
|           |       |      | 1.77                                     | 12.42                             | 26               | 996           | 19                     | 0.77               | 444          | 147                                |
|           |       |      | 1.88                                     | 11.78                             | 18               | 741           | 13                     | 0.72               | 444          | 147                                |
|           |       | 2009 | 3.21                                     | 21.71                             | 41               | 380           | 25                     | 2.08               | 451          | 153                                |
|           |       |      | 2.86                                     | 22.85                             | 38               | 566           | 25                     | 1.51               | 451          | 153                                |
|           |       |      | 2.98                                     | 25.06                             | 40               | 457           | 29                     | 1.90               | 451          | 153                                |
|           | NW-E  | 2008 | 2.04                                     | 14.78                             | 38               | 356           | 27                     | 1.33               | 668          | 147                                |
|           |       |      | 2.51                                     | 20.78                             | 33               | 355           | 24                     | 1.15               | 668          | 147                                |
|           |       |      | 2.56                                     | 19.37                             | 37               | 358           | 27                     | 1.57               | 668          | 147                                |
|           |       | 2009 | 1.43                                     | 25.64                             | 25               | 434           | 17                     | 0.93               | 669          | 177                                |
|           |       |      | 1.08                                     | 19.24                             | 24               | 339           | 20                     | 1.18               | 669          | 177                                |
|           |       |      | 0.68                                     | 15.57                             | 28               | 359           | 22                     | 1.07               | 669          | 177                                |
| Coldspots | MS-C  | 2008 | 0.43                                     | 7.10                              | 28               | 94            | 22                     | 2.00               | 318          | 175                                |
|           |       |      | 0.38                                     | 6.98                              | 27               | 74            | 19                     | 2.23               | 318          | 175                                |
|           |       |      | 0.50                                     | 6.41                              | 16               | 78            | 15                     | 1.35               | 318          | 175                                |
|           |       | 2009 | 0.04                                     | 1.27                              | 10               | 427           | 9                      | 0.24               | 577          | 216                                |
|           |       |      | 0.08                                     | 2.24                              | 13               | 449           | 12                     | 0.27               | 577          | 216                                |
|           |       |      | 0.04                                     | 1.87                              | 10               | 407           | 8                      | 0.18               | 577          | 216                                |
|           | AG-CC | 2008 | 0.09                                     | 6.84                              | 9                | 220           | 9                      | 0.29               | 596          | 161                                |
|           |       |      | 0.14                                     | 6.77                              | 12               | 173           | 10                     | 0.47               | 596          | 161                                |
|           |       |      | 0.22                                     | 7.65                              | 15               | 244           | 12                     | 0.52               | 596          | 161                                |
|           |       | 2009 | 0.17                                     | 3.31                              | 9                | 174           | 9                      | 0.36               | 559          | 195                                |
|           |       |      | 0.21                                     | 3.48                              | 7                | 212           | 6                      | 0.20               | 559          | 195                                |
|           |       |      | 0.21                                     | 4.24                              | 8                | 204           | 8                      | 0.22               | 559          | 195                                |
|           | BB-N  | 2008 | 0.18                                     | 3.63                              | 18               | 409           | 15                     | 0.40               | 795          | 203                                |
|           |       |      | 0.06                                     | 4.28                              | 16               | 403           | 15                     | 0.40               | 795          | 203                                |
|           |       |      | 0.14                                     | 3.78                              | 16               | 463           | 14                     | 0.37               | 795          | 203                                |
|           |       | 2009 | 0.93                                     | 4.54                              | 17               | 402           | 16                     | 0.52               | 810          | 160                                |
|           |       |      | 0.42                                     | 3.19                              | 18               | 274           | 15                     | 0.52               | 810          | 160                                |
|           |       |      | 0.39                                     | 2.00                              | 15               | 242           | 12                     | 0.59               | 810          | 160                                |
